# Supplementary material
Source: publisher site journal article supplement (https://www.dovepress.com/article/258368)
Supplement: Supplementary file 1 [file get_supplementary_file.php]

**
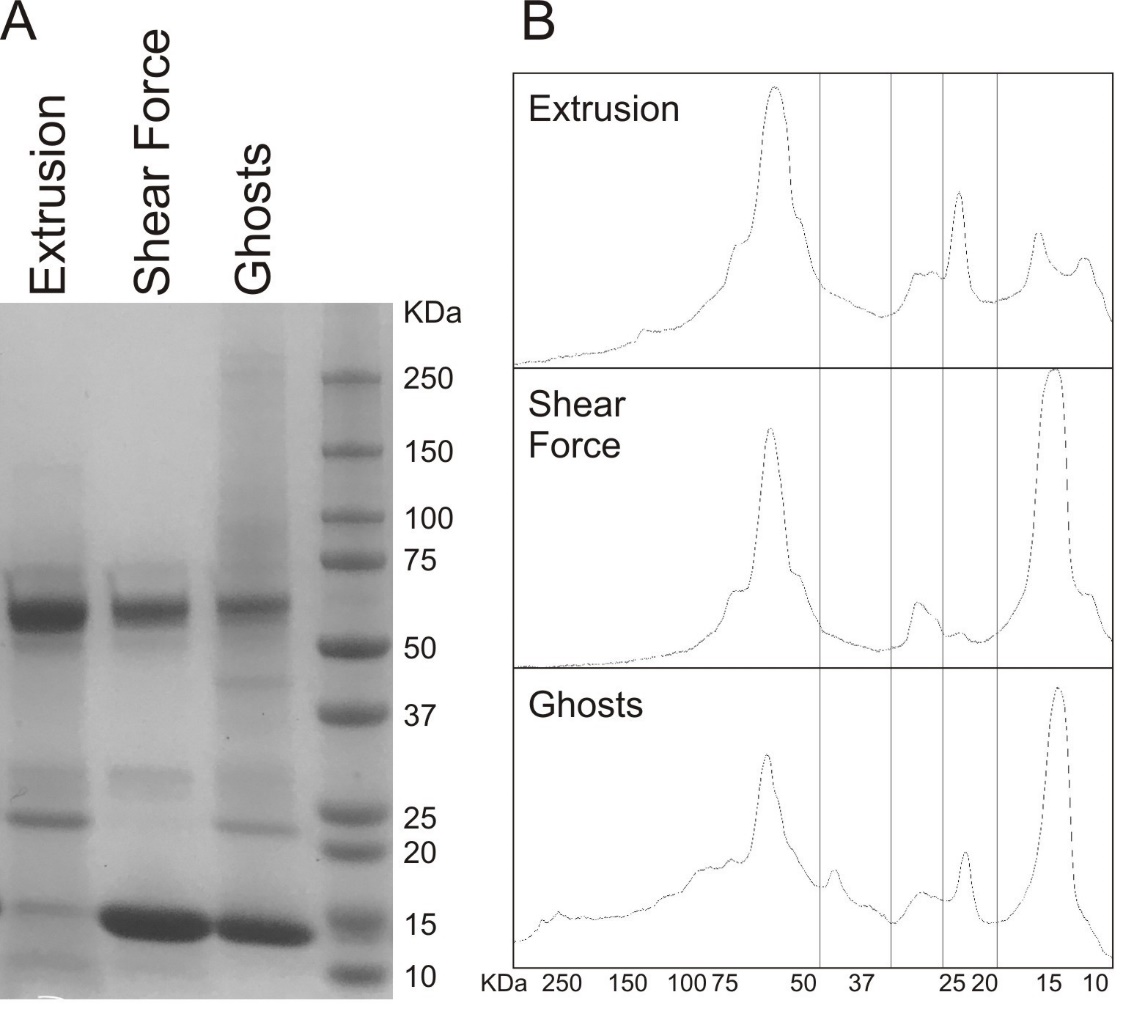
**

**Supplementary Figure 1** **Protein content.** Total proteins extracted from ghosts and NEs produced by extrusion and shear force analyzed by SDS-PAGE (A). Total proteins, extracted with CelLytic M (Sigma-Aldrich Chemie GmbH) lysis buffer, were loaded on a polyacrylamide gel with 10-250 kDa protein standard (Bio-Rad Laboratories AG). The gel was stained with Comassie blue (Axon Lab AG, Baden-Dättwil, Switzerland) over night and relative semi-quantitative analysis (B) was performed by Image J version 1.46r for Windows (ImageJ Inc.).
